# Supplementary material for: Eco-friendly porous composite of octaphenyl polyhedral oligomeric silsesquioxane and HKUST-1 with hydrophobic–oleophilic properties towards sorption of oils and organic solvents
Source: Royal Society of Chemistry journal article supplement (doi:10.1039/d4dt01397b), 2024-01-01
Supplement: d4dt01397b1.pdf [file d4dt01397b1.pdf]

## Electronic Supplementary Information

### **Eco-friendly Porous Composite of Octaphenyl Polyhedral Oligomeric Silsesquioxane and HKUST-1 with Hydrophobic-Oleophilic Properties towards Sorption of Oils and Organic Solvents**

Kanakarasu Dharmaraj,<sup>a</sup> Mohandas Sanjay Kumar,<sup>b</sup> Nallasamy Palanisami,<sup>c</sup>  
Muthuramalingam Prakash,<sup>b</sup> Pushparaj Loganathan,<sup>a</sup> Swaminathan Shanmugan<sup>\*a</sup>

<sup>a</sup>Department of Chemistry, Faculty of Engineering and Technology, SRM Institute of Science and Technology, Kattankulathur-603 203, Chengalpattu, Tamil Nadu, India.

E-mail: [shanmugs2@srmist.edu.in](mailto:shanmugs2@srmist.edu.in) & [shanmugan0408@gmail.com](mailto:shanmugan0408@gmail.com)

<sup>b</sup>Computational Chemistry Research Laboratory (CCRL), Department of Chemistry, Faculty of Engineering and Technology, SRM Institute of Science and Technology, Kattankulathur-603 203, Chengalpattu, Tamil Nadu, India.

<sup>c</sup>Centre for Functional Materials, Department of Chemistry, School of Advanced Sciences, Vellore Institute of Technology, Vellore-632014, Tamil Nadu, India.

## Table of content

### Synthesis of Octaphenyl POSS

### Synthesis of HKUST-1

**Fig. S1** (a) FT-IR spectrum of Ph-POSS@HKUST-1 (from 400 to 2100  $\text{cm}^{-1}$ ); (b) Overlapped PXRD patterns of Ph-POSS, HKUST-1, and Ph-POSS@HKUST-1.

**Fig. S2**  $\text{N}_2$  isotherm for HKUST-1, inset shows pore size distribution measured at 77 K (Black and red circles represent adsorption and desorption respectively)

**Fig. S3** Chemical stability PXRD spectra of Ph-POSS@HKUST-1 with different solvents (THF, Hexane and Ethanol)

Estimation of octaphenyl POSS composited with HKUST-1

**Fig. S4** Photographs show the water-wetting behavior at different (a) 0.25, (b) 0.5, (c) 0.75, (d) 1.0 (e) 1.5 and (f) 2.0 equivalents Ph-POSS loading in HKUST-1 for the synthesis of Ph-POSS@HKUST-1

**Fig. S5** Photographic images of (a) water wetting behaviour of (i) HKUST-1 (ii) Ph-POSS@HKUST-1; (b) water wetting behaviour of (i) PU sponge (ii) PDA@sponge and (iii) Ph-POSS@HKUST-1@PDA@Sponge; (c) (i) water droplet on the surface of Ph-POSS@HKUST-1, (ii) oil droplet on the surface of Ph-POSS@HKUST-1; (d) (i) water droplets on the surface of Ph-POSS@HKUST-1@PDA@Sponge, (ii) oil droplets on the surface of Ph-POSS@HKUST-1@PDA@Sponge.

**Fig. S6** Photographic images of (a) Stability checkup for Ph-POSS@HKUST-1 under acid and alkaline medium; (b) Stability checkup for Ph-POSS@HKUST-1 under acidic condition with stirring at different times (500 rpm); (c) Stability checkup for Ph-POSS@HKUST-1 under alkaline condition with stirring at different times (500 rpm)

**Fig. S7** (a) The photographs of Ph-POSS@HKUST-1@PDA@Sponge exposed to acid, salt, and alkaline conditions; (b) HR-SEM images of Ph-POSS@HKUST-1@PDA@Sponge after being treated with (i) acid, (ii) alkaline and (iii) salt medium.

### References

## Synthesis of Octaphenyl POSS

Octaphenyl POSS was synthesized according to the previously reported literature.<sup>1,2</sup> Initially, 0.3 grams of KOH were suspended in 40 ml of toluene in a dried 100 ml double-neck round-bottom flask under a nitrogen atmosphere. To the above reaction mixture, 3.6 ml of phenyltriethoxy silane was added, and the solution was refluxed at 110 °C. Subsequently, 0.5 ml of water was methodically introduced at three-hour intervals, repeating the process three times. A white precipitate formed overnight, and the reaction solution was continuously refluxed for three days. Finally, the resulting product was filtered, washed with water and methanol, and subsequently dried overnight. Yield: 2.762 grams (86 %). FT-IR (KBr,  $\text{cm}^{-1}$ ): 3079(m), 3026(m), 1596(m), 1436(m), 1138(s), 1116(s), 1028(m), 994(m), 743(s), 698(s), 623(w), 606(m), 497(m). Solid state  $^{29}\text{Si}$  NMR CP-MAS (8 kHz, TMS, PPM): -77.7. TGA: temperature range (weight loss): 100–180 °C (7.7%), 360–850 °C (45.6%).

Octaphenyl POSS is insoluble in most the solvents but very slightly soluble in dichloromethane under hot condition.

## Synthesis of HKUST-1

HKUST-1 was synthesized according to previously reported literature.<sup>3</sup> Briefly, 1.22 grams of  $\text{Cu}(\text{NO}_3)_2 \cdot 3\text{H}_2\text{O}$  and 0.58 grams of 1,3,5-benzene tricarboxylic acid were dissolved in 5 grams of DMSO. This reaction solution was slowly added into the methanol solution and stirred continuously for 24 hours; the resulting product was obtained by centrifugation and washed with the excess amount of methanol three times, dried at 60 °C for overnight. Yield: 0.140 grams (45%). FT-IR (KBr,  $\text{cm}^{-1}$ ): 3490(b), 1647(s), 1588(w), 1452(m), 1375(s), 1112(m), 936(w), 758(m), 729(s), 490(m). TGA: temperature range (weight loss): 30–250 °C (35.1%), 265–420 °C (30.1%) and 420–830 °C (22.8 %).

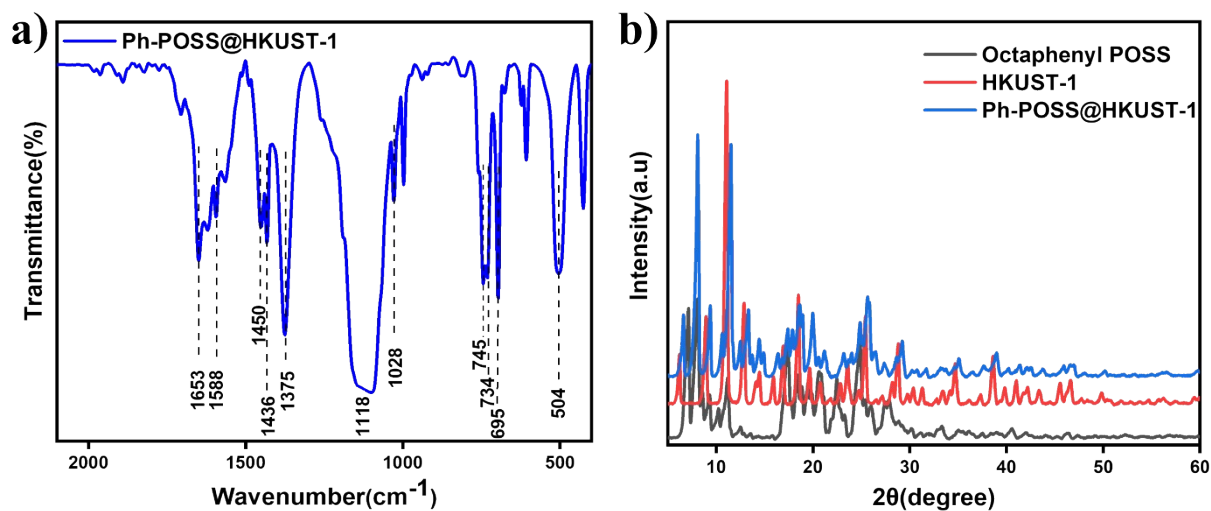

**Fig. S1** (a) FT-IR spectrum of Ph-POSS@HKUST-1 (from 400 to 2100  $\text{cm}^{-1}$ ); (b) Overlapped PXRD patterns of Octaphenyl POSS, HKUST-1, and Ph-POSS@HKUST-1.

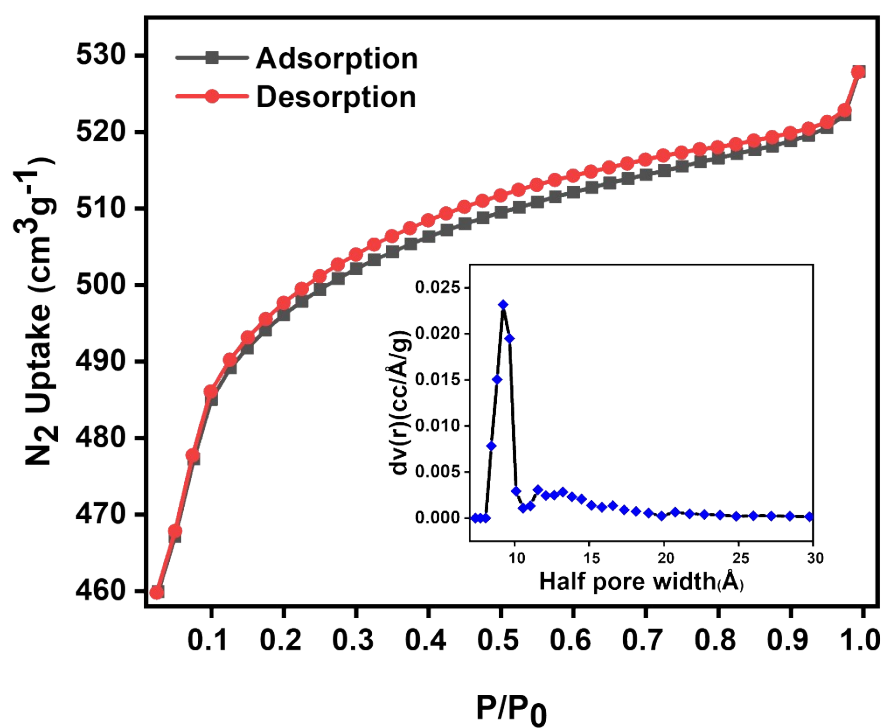

**Fig. S2**  $\text{N}_2$  isotherm for HKUST-1, inset shows pore size distribution measured at 77 K (Black and red circles represent adsorption and desorption respectively).

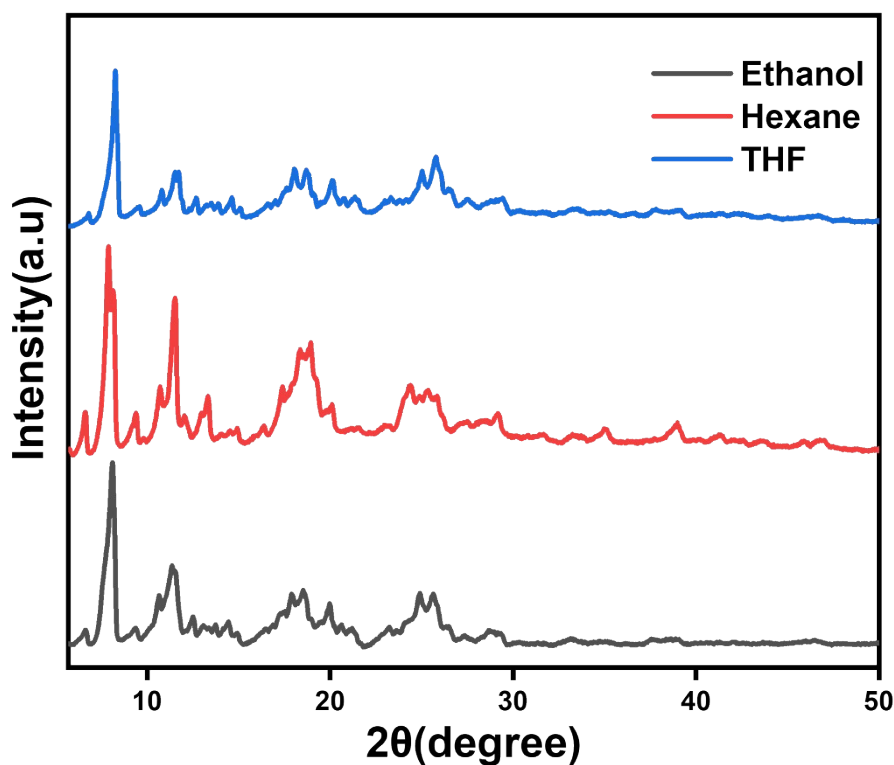

**Fig. S3** Chemical stability PXR D spectra of Ph-POSS@HKUST-1 with different solvents (THF, Hexane and Ethanol).

#### Estimation of octaphenyl POSS composited with HKUST-1

The residual weight % of Ph-POSS@HKUST-1

(the cage structural of POSS)

15.2

Quantity of Octaphenyl POSS

————— = 37.81 wt % composited with HKUST-1

40.2

The molecular weight fraction of the cage  
structural POSS in Octaphenyl POSS

Ph-POSS@HKUST-1:

Octaphenyl POSS = 37.81 wt%, ratio:2

HKUST-1 = 62.19 wt%, ratio: 3

Compared with the thermal decomposition behaviors of Ph-POSS and HKUST-1, Ph-POSS@HKUST-1 exhibited a significantly higher weight loss of 85 wt%. Furthermore, the amount of Ph-POSS on the HKUST-1 was estimated to be around 37.81 wt%. This estimation was performed based on the residual 15.2 wt% of the POSS cage and the molecular weight fraction of the POSS cage (40.2 wt%) in Ph-POSS, which closely matched the content of Ph-POSS in Ph-POSS@HKUST-1 during the synthesis process. The results demonstrated that incorporation of Ph-POSS to HKUST-1 in 2:3 ratio successfully leads to the formation of the Ph-POSS@HKUST-1 composite material.

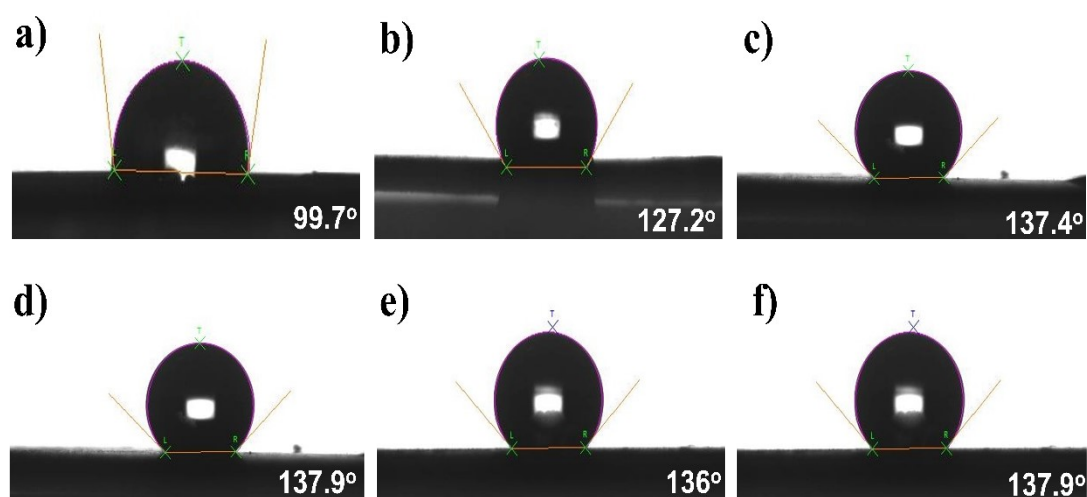

**Fig. S4** Photographs show the water-wetting behavior at different (a) 0.25, (b) 0.5, (c) 0.75, (d) 1.0 (e) 1.5 and (f) 2.0 equivalents Ph-POSS loading in HKUST-1 for the synthesis of Ph-POSS@HKUST-1.

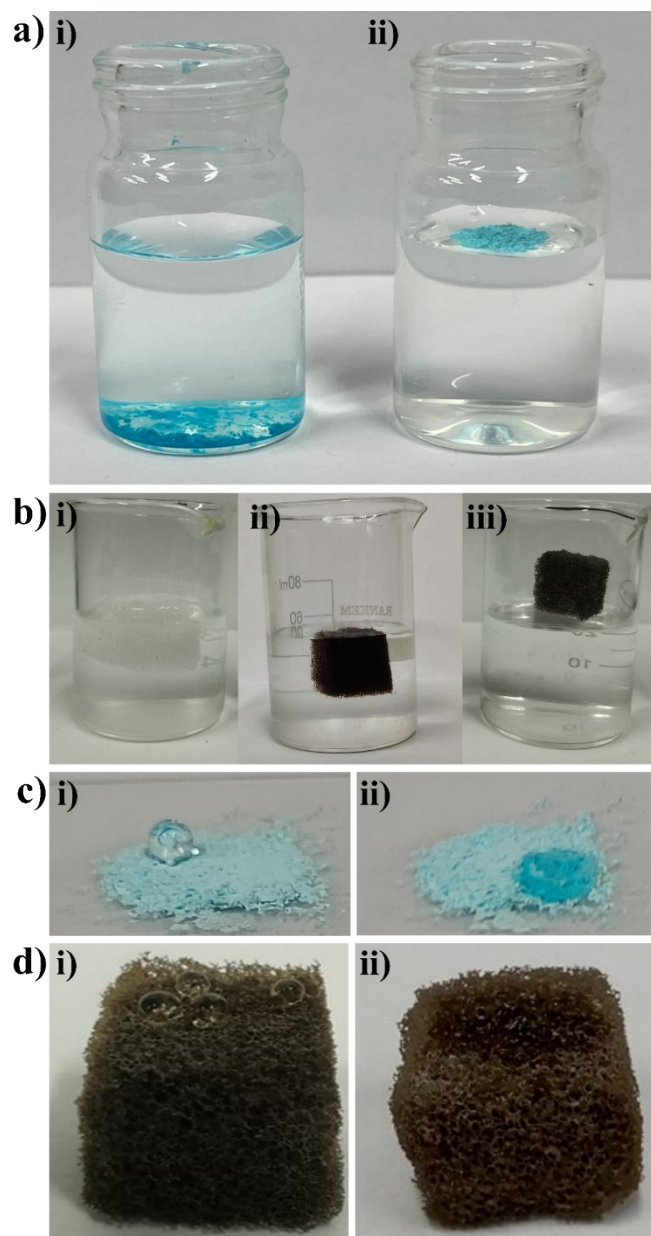

**Fig. S5** Photographic images of (a) water wetting behaviour of (i) HKUST-1 (ii) Ph-POSS@HKUST-1; (b) water wetting behaviour of (i) PU sponge (ii) PDA@sponge and (iii) Ph-POSS@HKUST-1@PDA@sponge; (c) (i) water droplet on the surface of Ph-POSS@HKUST-1, (ii) oil droplet on the surface of Ph-POSS@HKUST-1; (d) (i) water droplets on the surface of Ph-POSS@HKUST-1@PDA@sponge, (ii) oil droplets on the surface of Ph-POSS@HKUST-1@PDA@sponge.

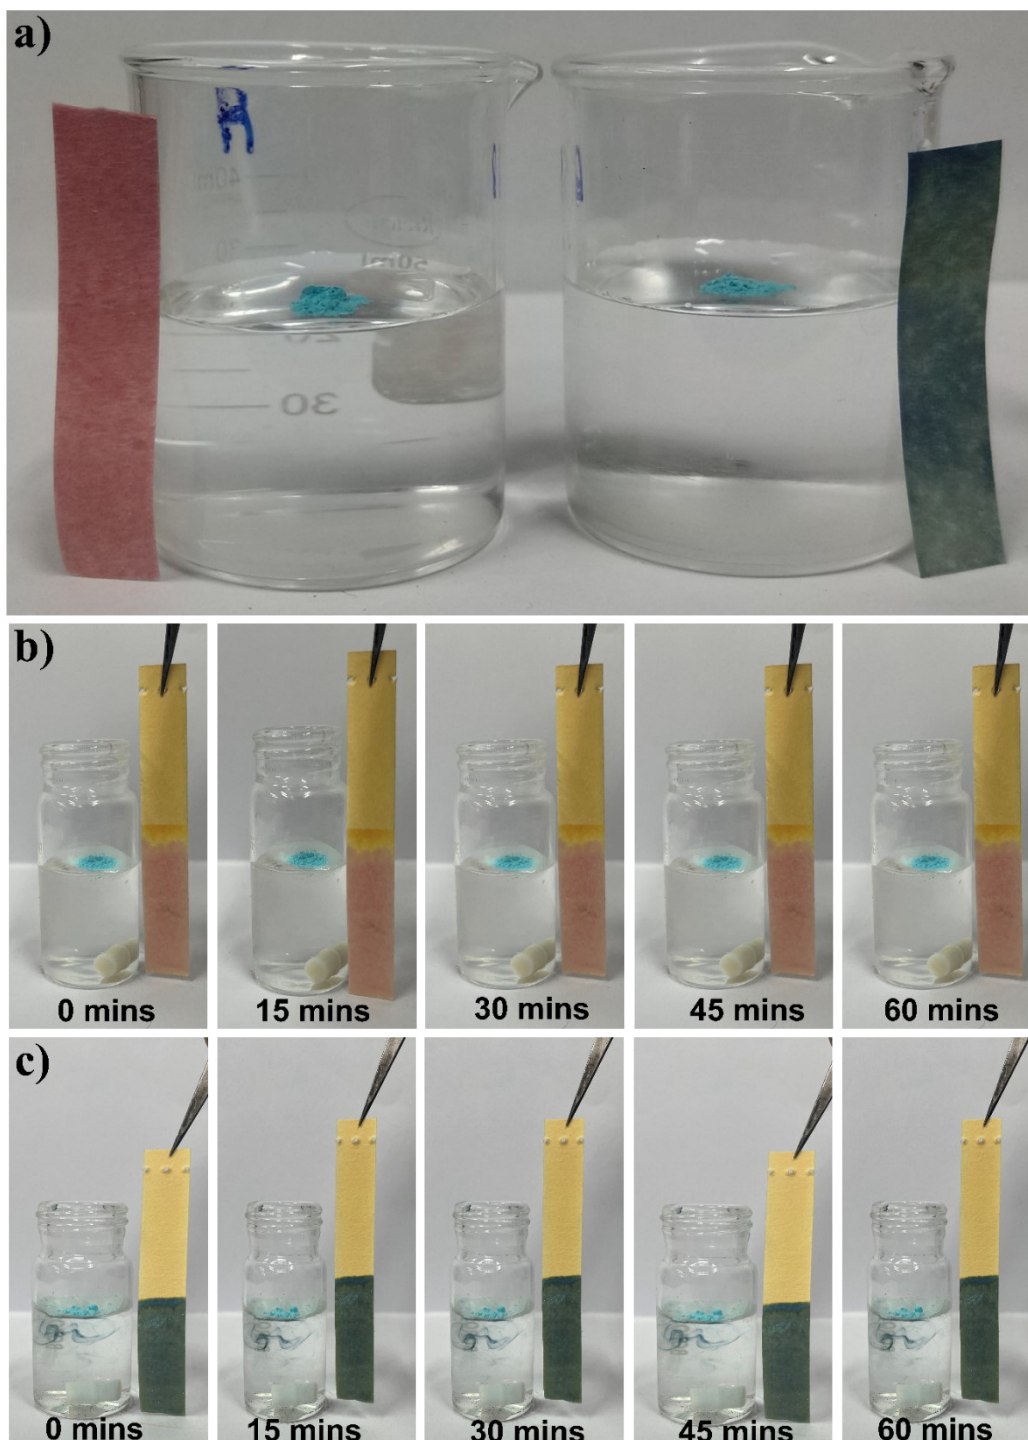

**Fig S6** Photographic images of (a) Stability checkup for Ph-POSS@HKUST-1 under acid and alkaline medium; (b) Stability checkup for Ph-POSS@HKUST-1 under acidic condition with stirring at different times (500 rpm); (c) Stability checkup for Ph-POSS@HKUST-1 under alkaline condition with stirring at different times (500 rpm)

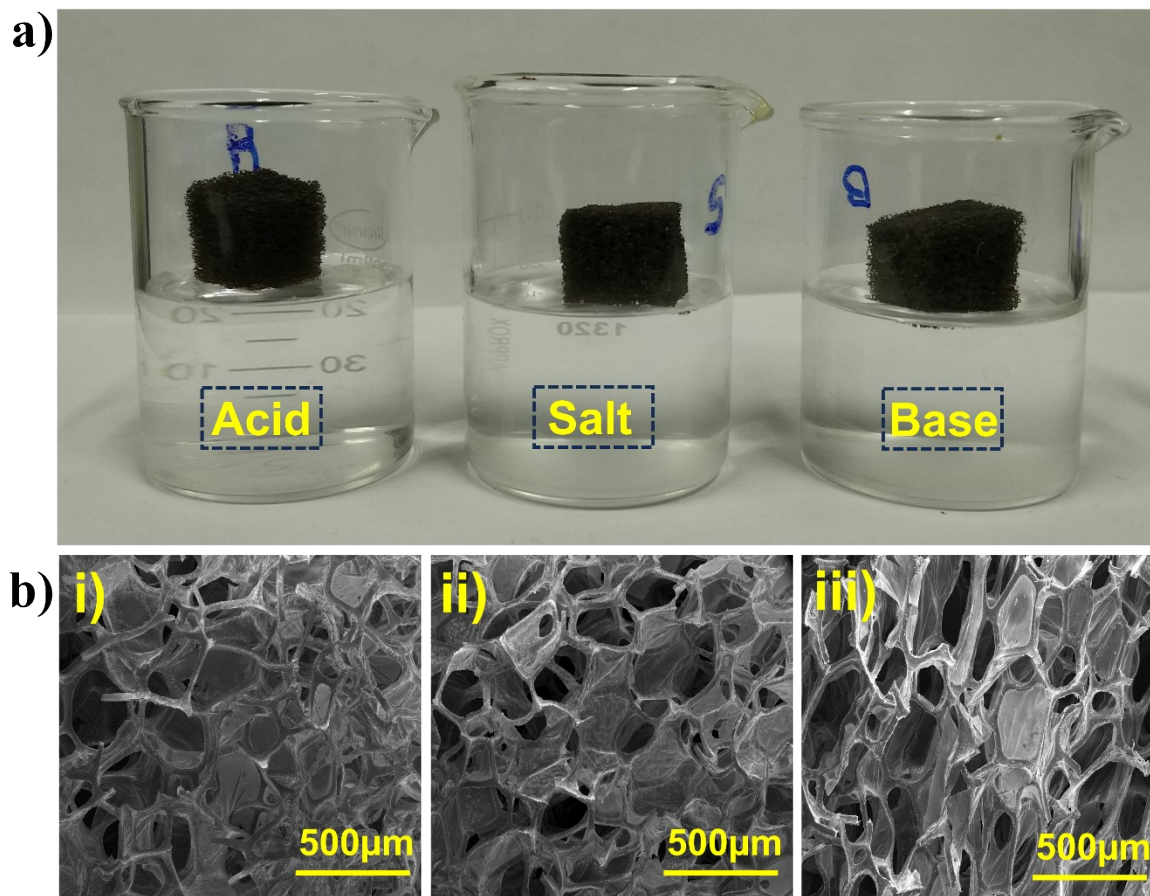

**Fig. S7** (a) The photographs of Ph-POSS@HKUST-1@PDA@Sponge exposed to acid, salt, and alkaline conditions; (b) HR-SEM images of Ph-POSS@HKUST-1@PDA@Sponge after being treated with (i) acid, (ii) alkaline and (iii) salt medium.

## References

1. K. Olsson and C. Gronwall, *Ark. Kemi.*, 1961, **17**, 529–540.
2. K. Song, Y. Jiang and Z. Zou, *ChemistrySelect*, 2020, **5**, 11438–11445.
3. J. L. Zhuang, D. Ceglarek, S. Pethuraj and A. Terfort, *Adv. Funct. Mater.*, 2011, **21**, 1442–1447.
